# Supplementary material for: IGF2BP1 promotes mesenchymal cell properties and migration of tumor-derived cells by enhancing the expression of LEF1 and SNAI2 (SLUG)
Source: PubMed Central journal article supplement (PMC3711427; doi:10.1093/nar/gkt410), 2013-05-15
Supplement: supp_gkt410_nar-02409-v-2012-File003.pdf [file supp_gkt410_nar-02409-v-2012-File003.pdf]

**A**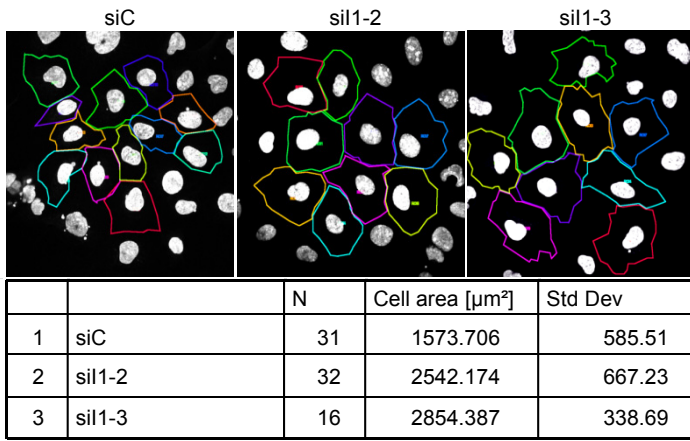**B**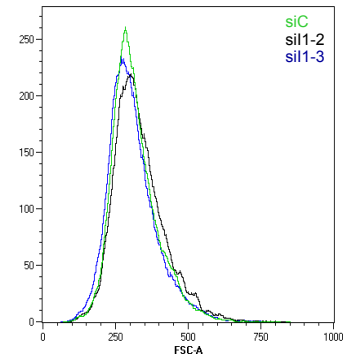**C**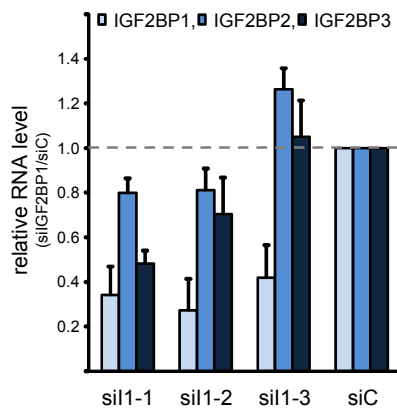**D**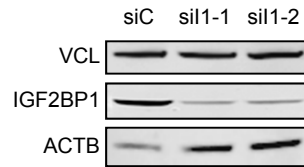**E**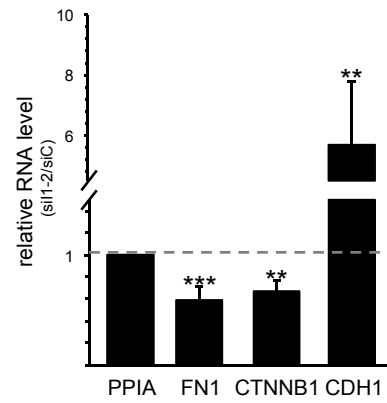**F**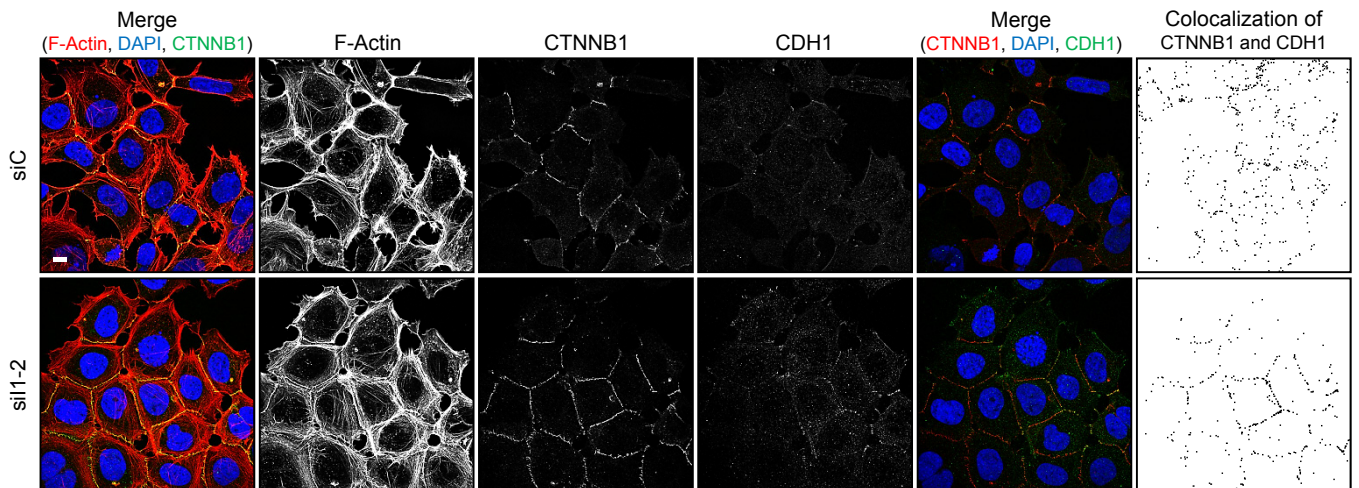

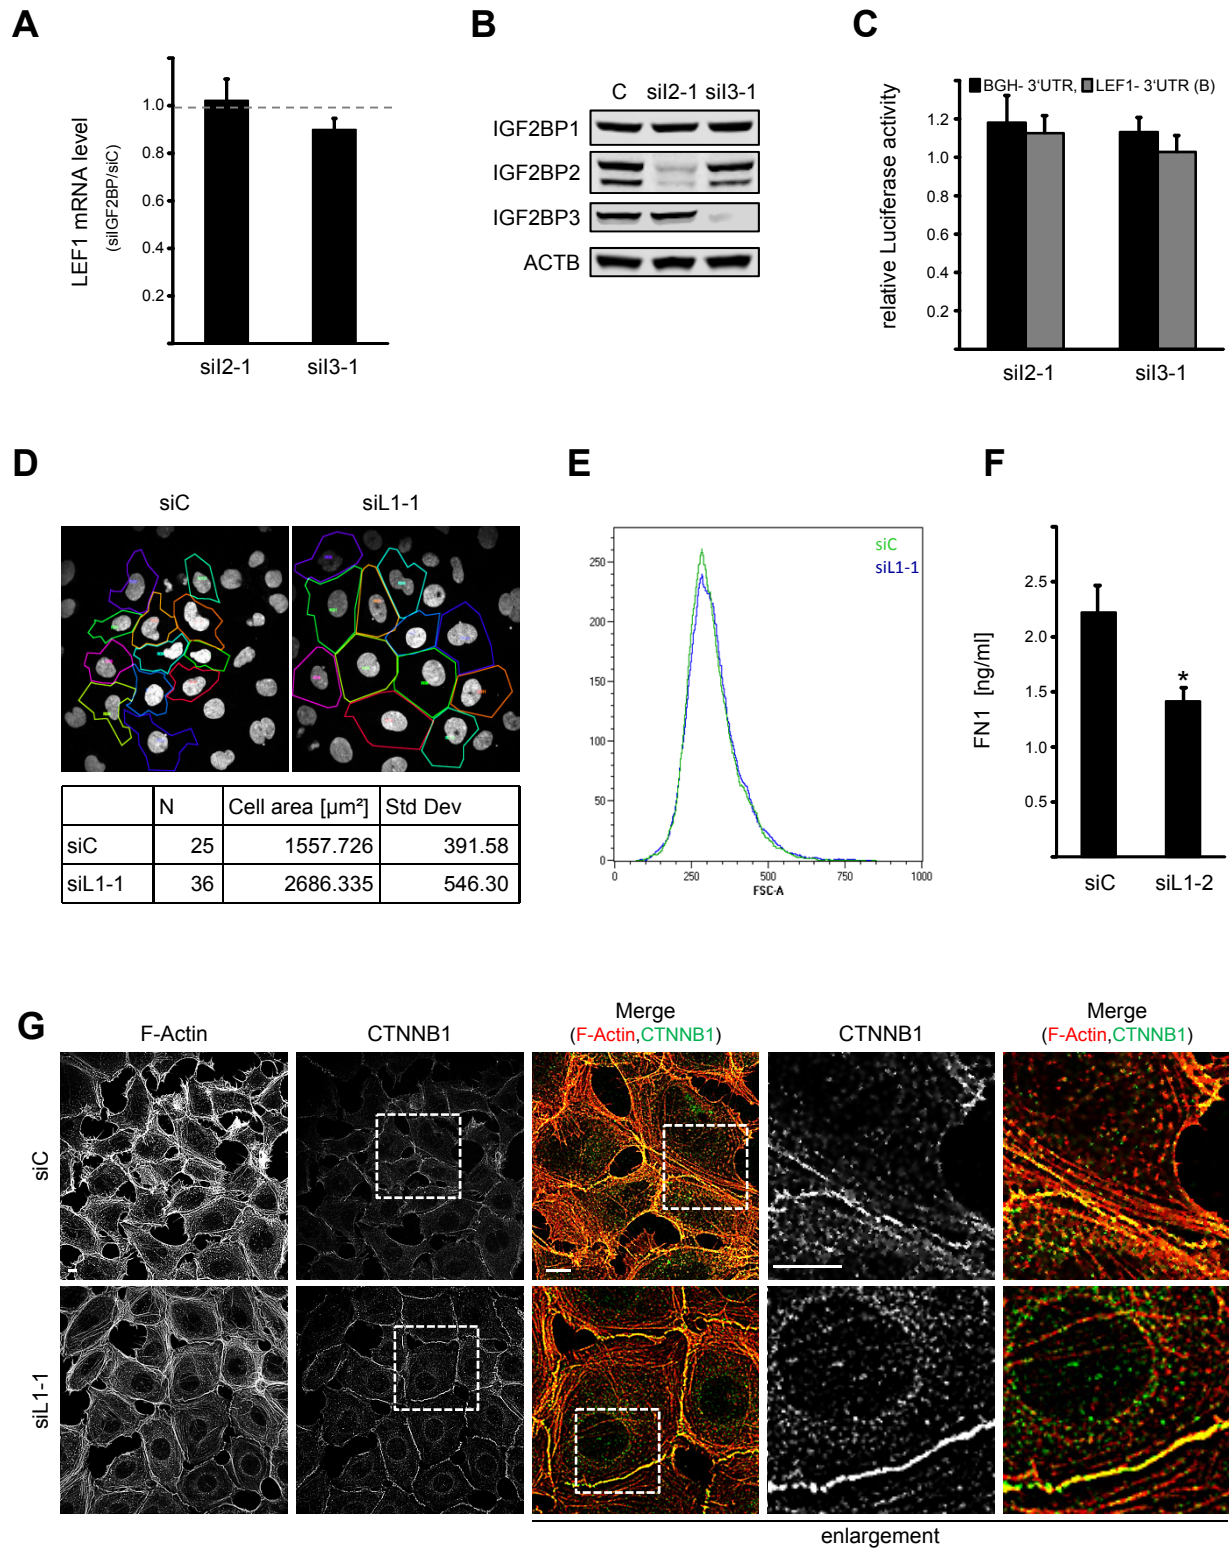

Figure S2, Zirkel et al.

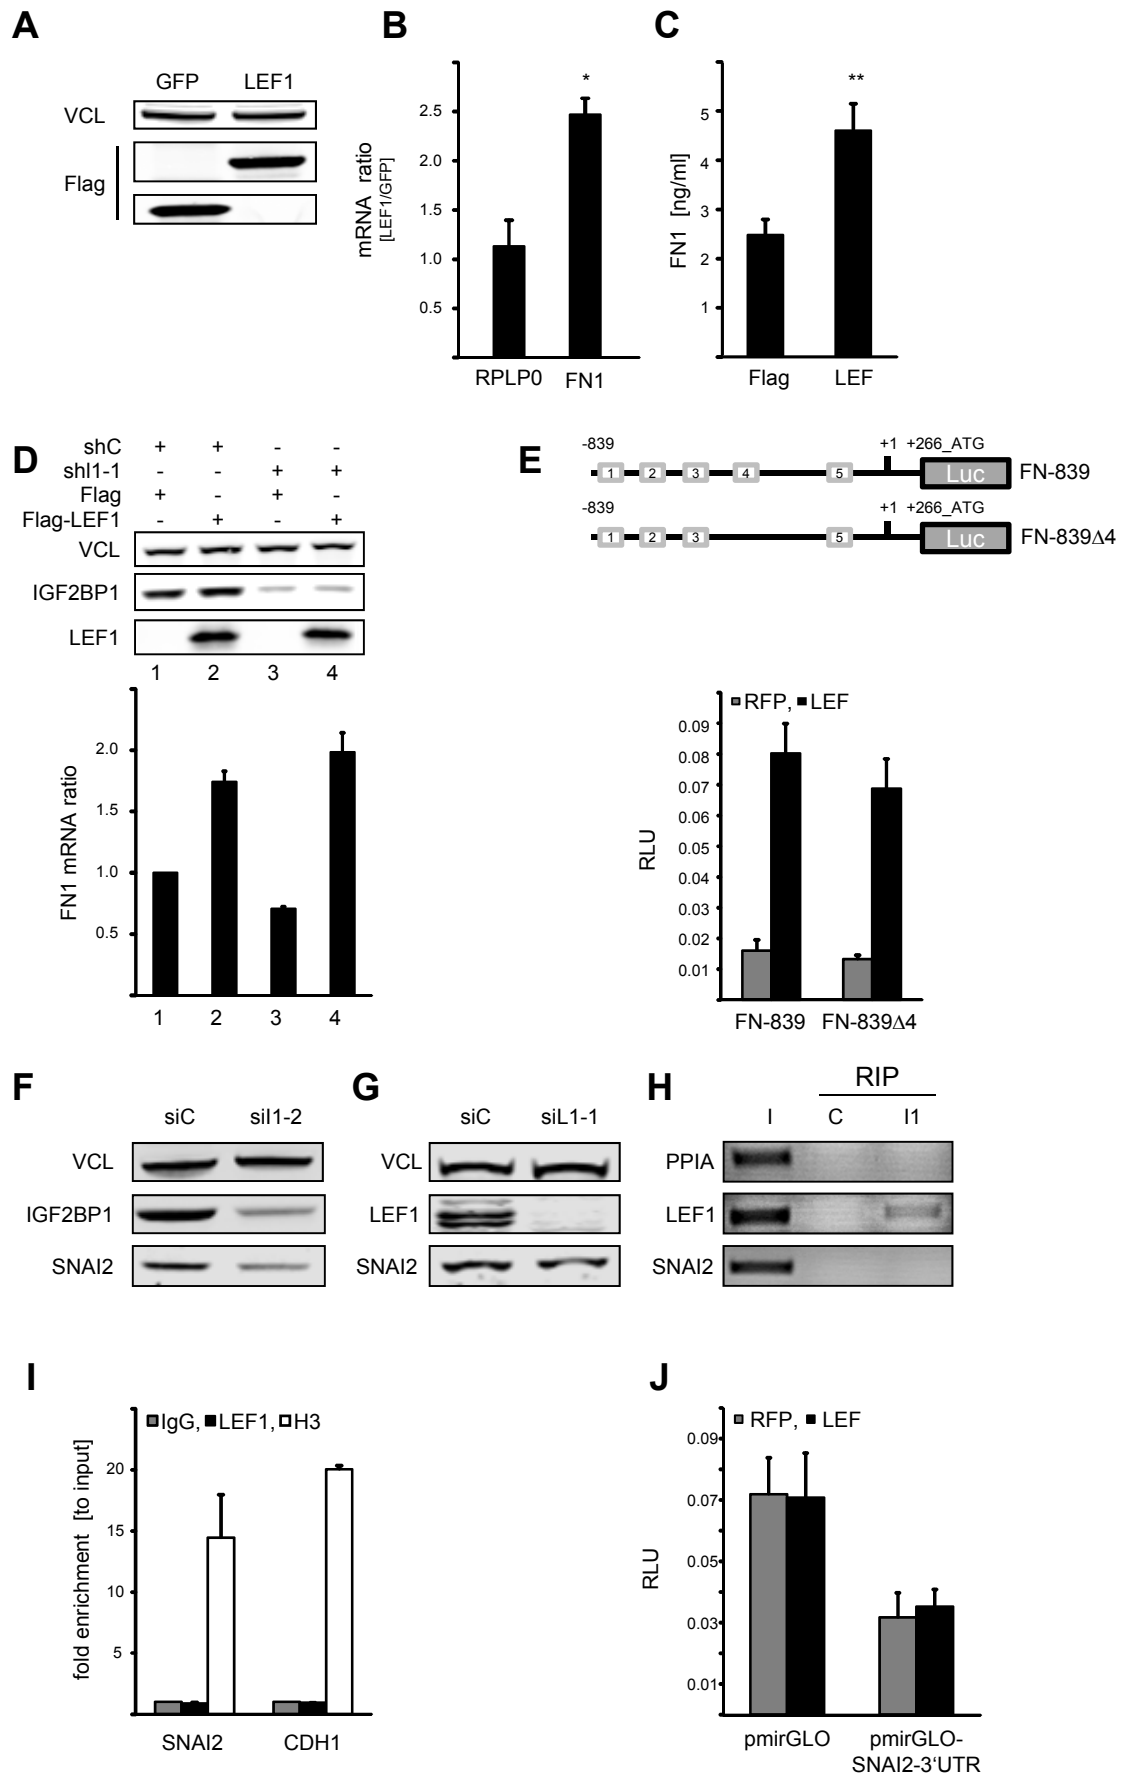

Figure S3, Zirkel et al.

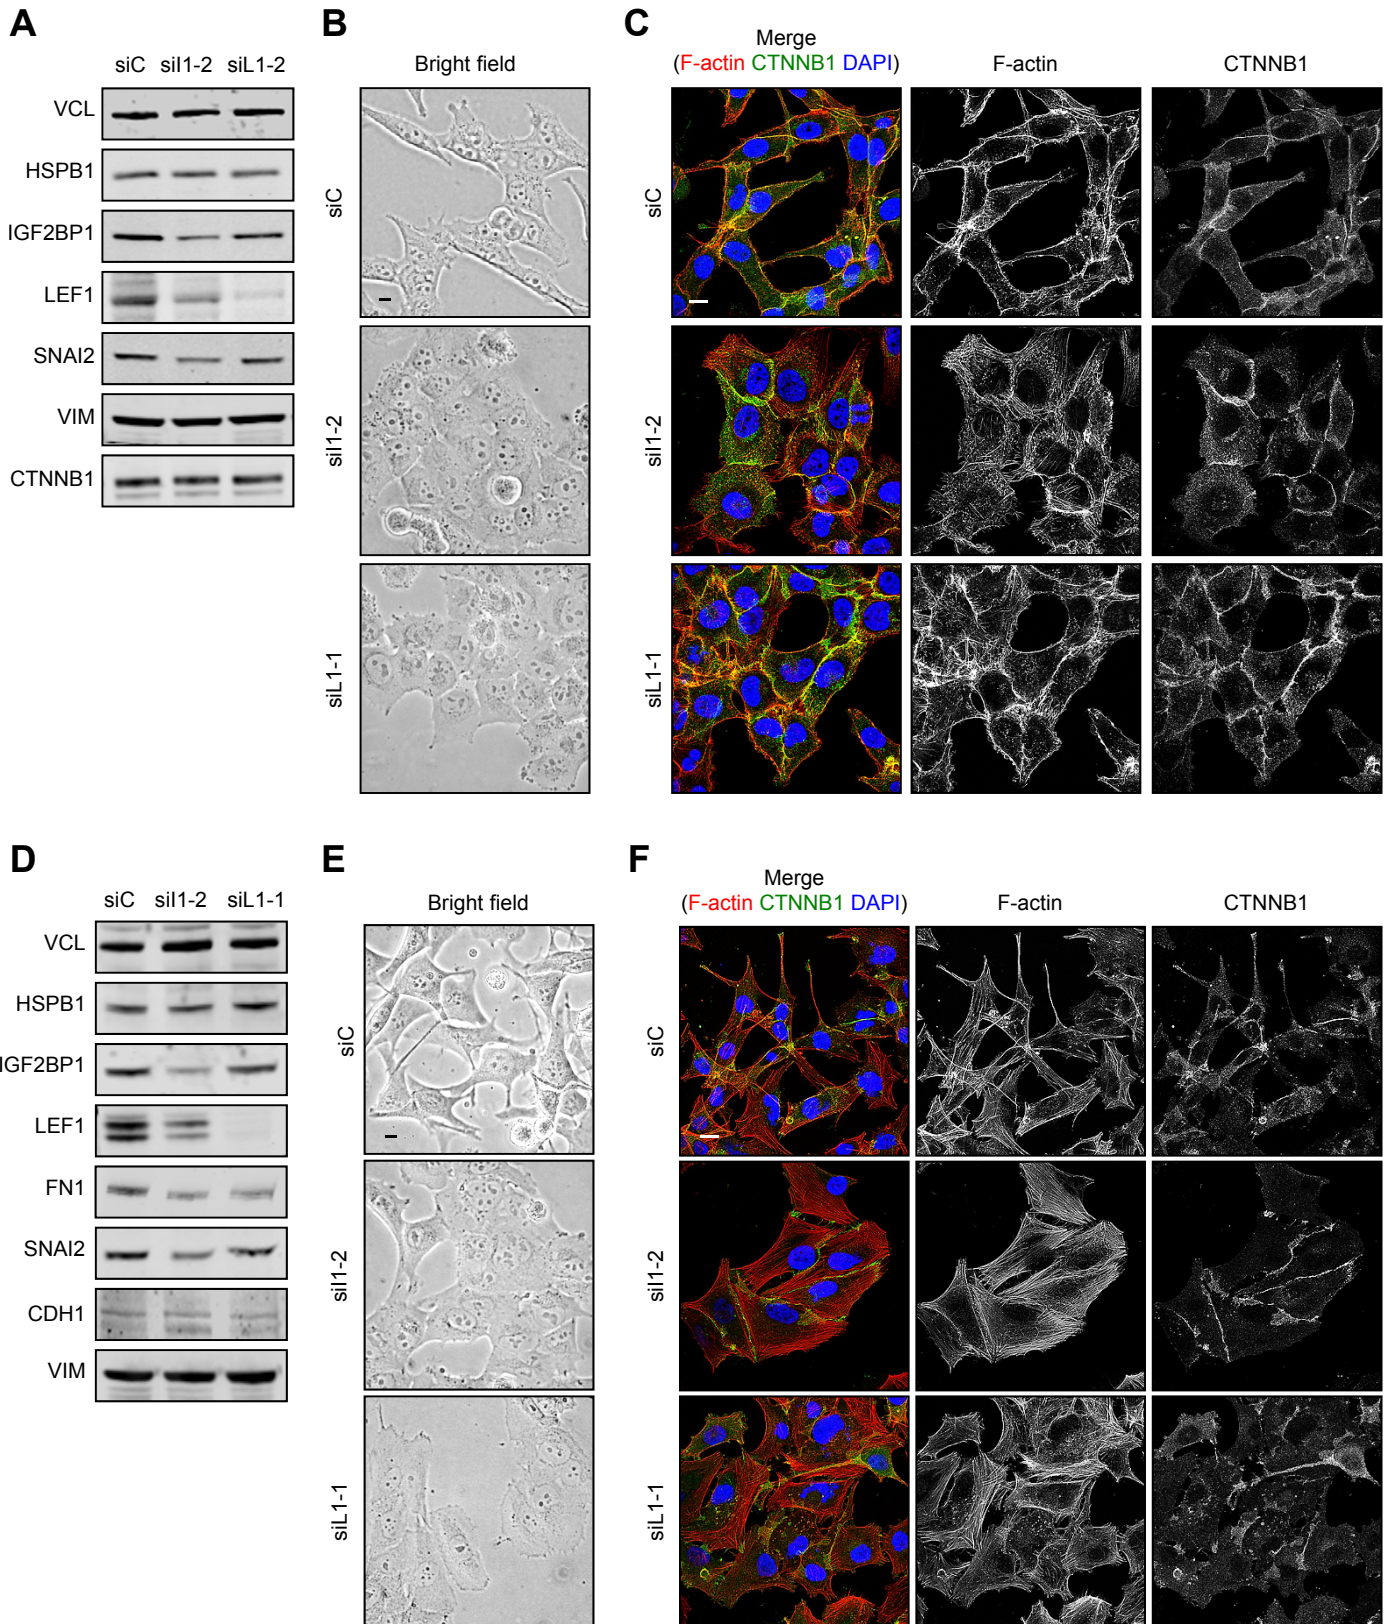

Figure S4, Zirkel et al.

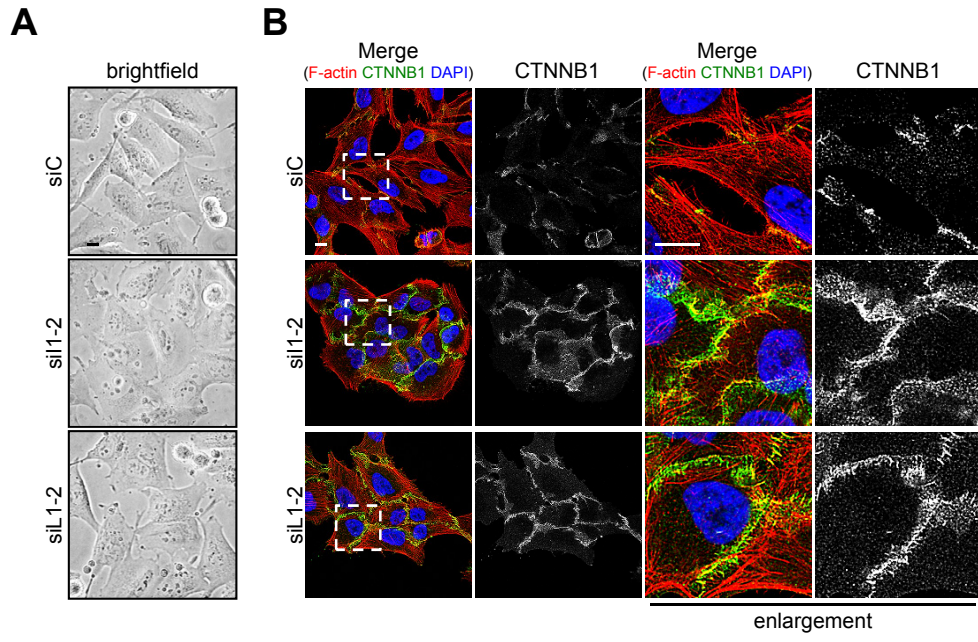

Figure S5, Zirkel et al.

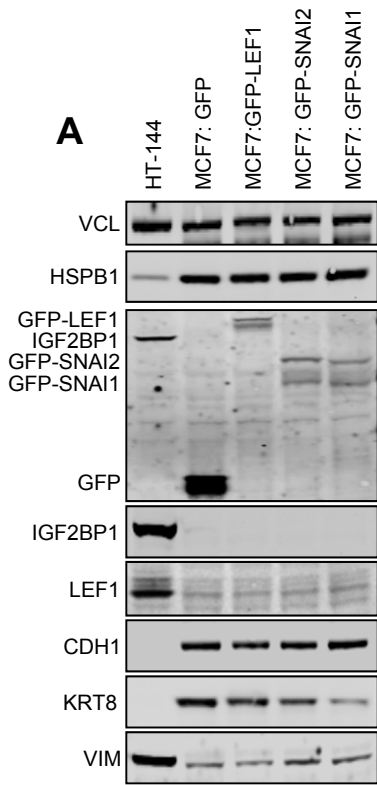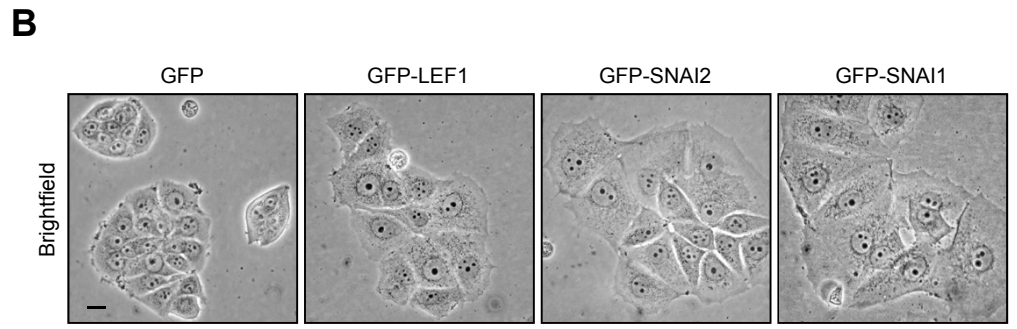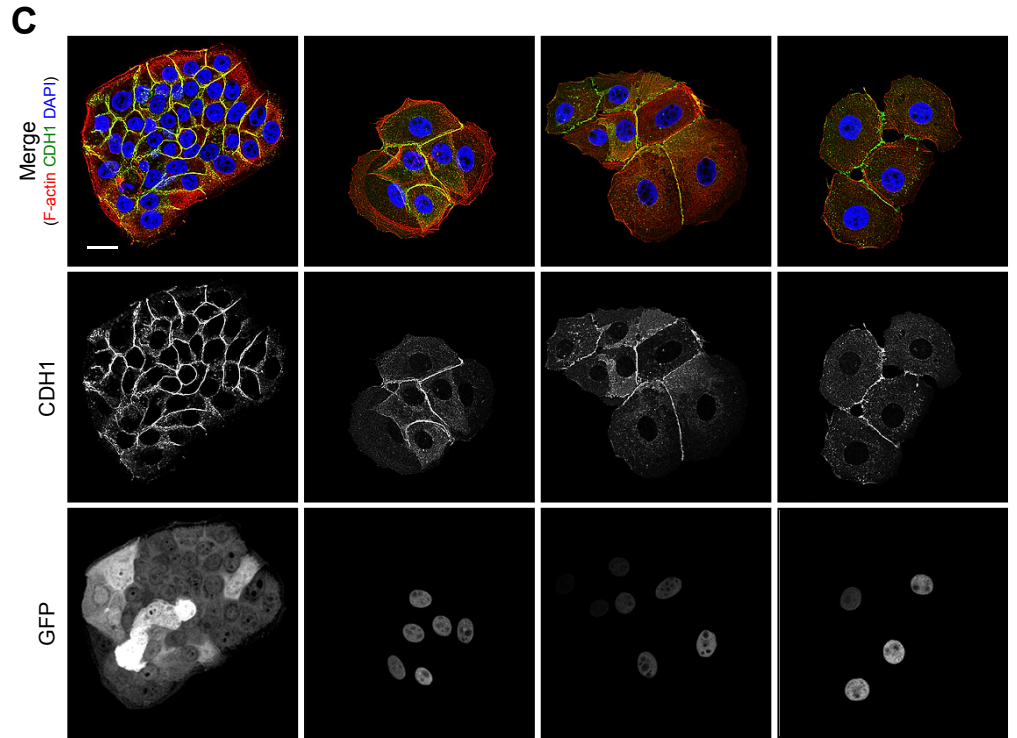

Figure S6, Zirkel et al.

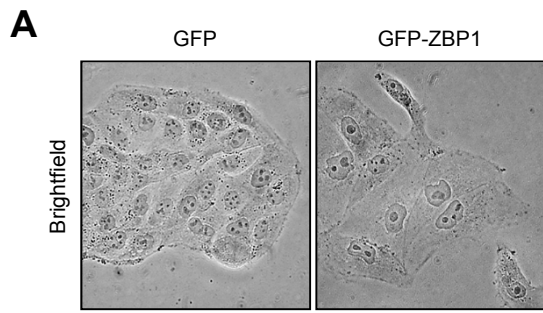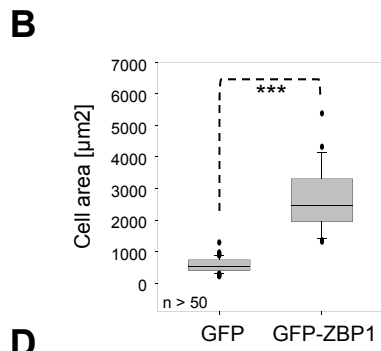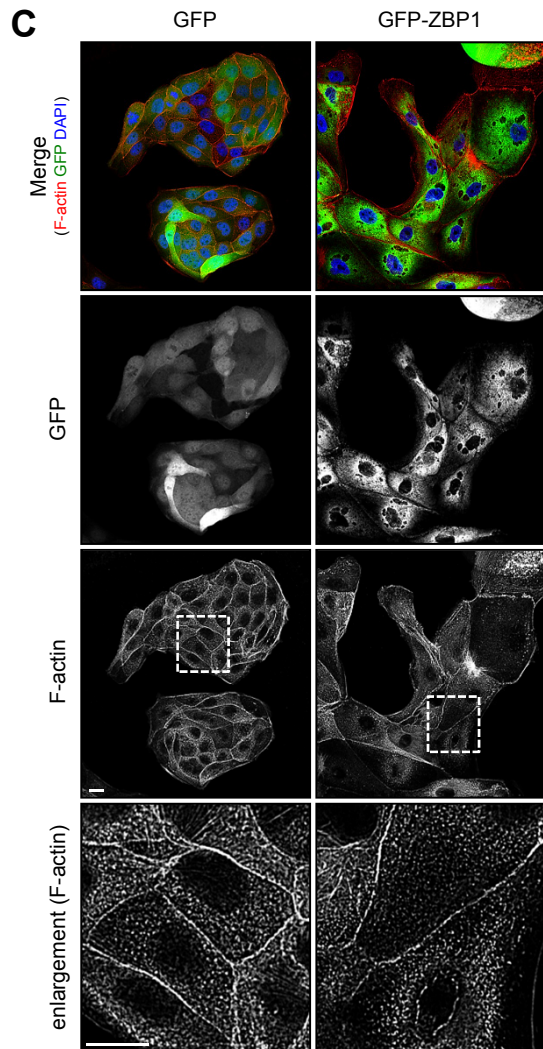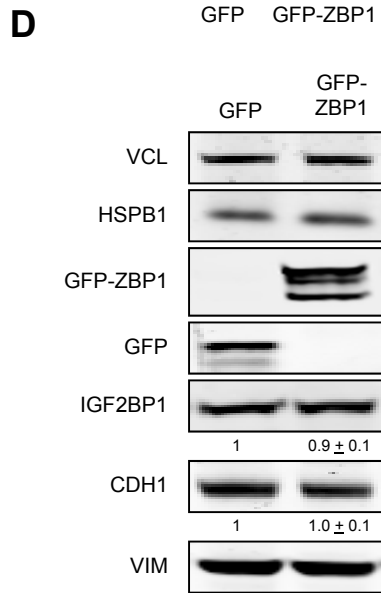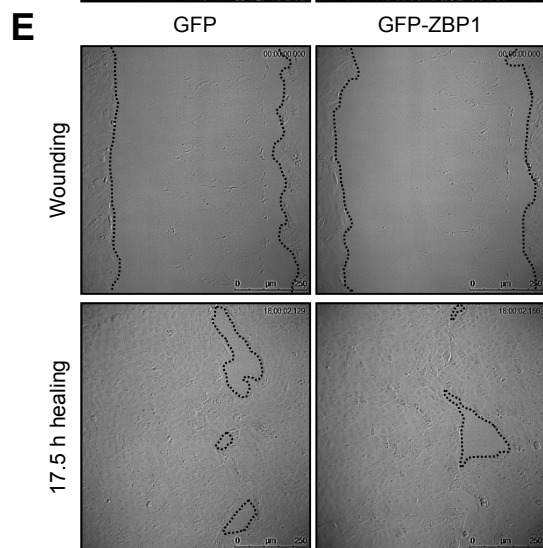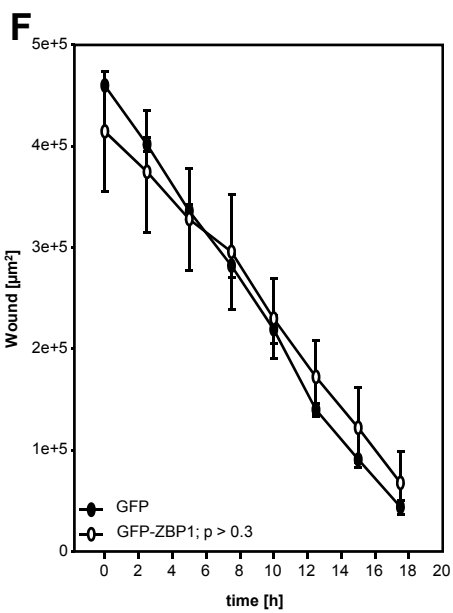

Figure S7, Zirkel et al.

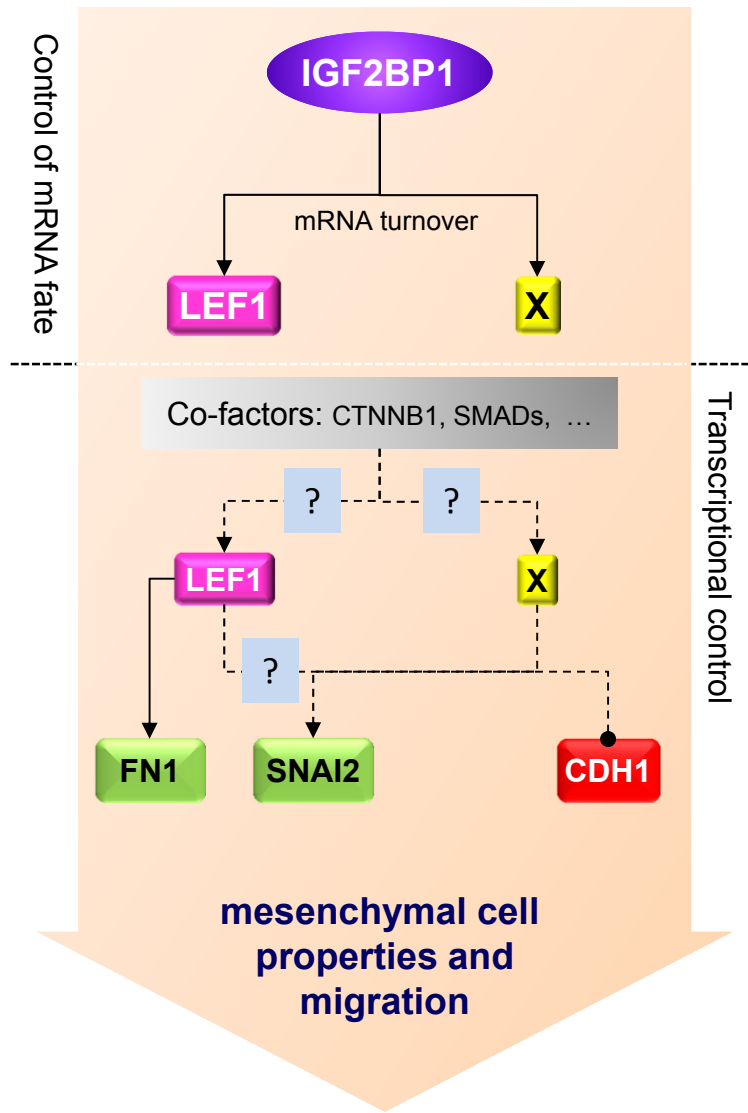

Figure S8, Zirkel et al.



**Table T1: plasmids**

| plasmids                   | vector                   | cloning                                                                                                  | insertion via       | sense oligo (5' to 3')                                           | antisense oligo (5' to 3')                                           |
|----------------------------|--------------------------|----------------------------------------------------------------------------------------------------------|---------------------|------------------------------------------------------------------|----------------------------------------------------------------------|
| Flag-LEF1                  | pcDNA3.1-Flag zeo        | RT-PCR, Zero Blunt (Life Technologies)                                                                   | BamHI EcoRI         | ccGGATCCatgcccaactctccggaggaggtggc                               | ccGAATTCcagatgtaggcagctgtcttctggac                                   |
| pLVX-LEF1                  | pLVX puro- new MCS       | RT-PCR, Zero Blunt (Life Technologies)                                                                   | BamHI EcoRI         | ccGGATCCatgcccaactctccggaggaggtggc                               | ccGAATTCcagatgtaggcagctgtcttctggac                                   |
| GFP-ZBP1                   | pEGFPC1                  | previously described (Huttelmaier et al., Nature 2005)                                                   |                     |                                                                  |                                                                      |
| Luc-LEF1-(A)               | pcDNA3.1 FFL             | RT-PCR from HEK293 cells, Zero Blunt (Life Technologies)                                                 | EcoRI XhoI          | ccGAATTCcaactggtgaaaacgaagctcattcc                               | ccCTCGAGaatgacatttttaaaatgtttattacaagc                               |
| Luc-LEF1-(B)               | pcDNA3.1 FFL             | RT-PCR from HEK293 cells, Zero Blunt (Life Technologies)                                                 | EcoRI XhoI          | ctGAATTCaaaccagactgtctccagcgc                                    | ccCTCGAGaatgacatttttaaaatgtttattacaagc                               |
| Luc-SNAI2-3'UTR            | pmirGLO                  | RT-PCR from HT-144 cells, Zero Blunt (Life Technologies)                                                 | BamHI XhoI          | GGATCCGCTAGCgtgacgaatcaatgtttactgaacag                           | TCTAGACTCGAGctttaaacaacatttctgacagtg                                 |
| <b>promotor constructs</b> |                          |                                                                                                          |                     |                                                                  |                                                                      |
| FN-839                     | pGL4.21                  | PCR from HEK293 genomic DNA, pGEMTeasy (Promega)                                                         | XhoI BglII          | ccttCTCGAGaaaagtaactgttcttctgtcc                                 | ggAGATCTgttgagacggtggggagag                                          |
| FN-789                     | pGL4.21                  | PCR from HEK293 genomic DNA, pGEMTeasy (Promega)                                                         | XhoI BglII          | ccttCTCGAGactccccggatctcaaaagcgc                                 | ggAGATCTgttgagacggtggggagag                                          |
| FN-739                     | pGL4.21                  | PCR from HEK293 genomic DNA, pGEMTeasy (Promega)                                                         | XhoI BglII          | ccttCTCGAGaagctcattaaagtctctgttc                                 | ggAGATCTgttgagacggtggggagag                                          |
| FN-689                     | pGL4.21                  | PCR from HEK293 genomic DNA, pGEMTeasy (Promega)                                                         | XhoI BglII          | ccttCTCGAGcttctcagaccagacagggc                                   | ggAGATCTgttgagacggtggggagag                                          |
| FN-559                     | pGL4.21                  | PCR from HEK293 genomic DNA, pGEMTeasy (Promega)                                                         | XhoI BglII          | ggCTCGAGggcagccccctgggactg                                       | ggAGATCTgttgagacggtggggagag                                          |
| FN+1                       | pGL4.21                  | PCR from HEK293 genomic DNA, pGEMTeasy (Promega)                                                         | XhoI BglII          | ggCTCGAGggccgcccctgtgtgac                                        | ggAGATCTgttgagacggtggggagag                                          |
| FN-839Δ4                   | pGL4.21                  | PCRs based on FN-839 using FN-839 sense and antisense oligos and following primers; three point ligation | XhoI/EcoRV/BglII    | ctGATATCaggagcggagatgggggaaagcag                                 | ctGATATCaaggtactgactcggactcccttat                                    |
| SNAI1 promotor             | pGL4.21                  | subcloned from Addgene; SNAI1-pGL2 (ID: 31694)                                                           | KpnI HindIII        |                                                                  |                                                                      |
| SNAI2 promotor             | pGL4.21                  | PCR from HEK293 genomic DNA, pGEMTeasy (Promega); according to Lambertini et al., 2010                   | XhoI BamHI in BglII | ccaaCTCGAGtctcaaaagtgtgagagaat                                   | gggcGGATCctccagcgggtctggc                                            |
| <b>sh-plasmids</b>         |                          |                                                                                                          |                     |                                                                  |                                                                      |
| pLVX puro- new MCS         |                          | previously described (Stohr et al., Genes Dev. 2012)                                                     |                     |                                                                  |                                                                      |
| shC                        | pLVX-shRNA2              | direct cloning of annealed oligos                                                                        | BamHI/ EcoRI        | GATCCGttgtactacacaaaagtactgTCAAGAGacagcttttgtgtagataTTTTTACGGGTG | AATTCACGGTAAAAAAttgtactacacaaaagtactgTCTCTGAAcagta cttttgtgtagatacCG |
| sh1-1                      | pLVX-shRNA2              | direct cloning of annealed oligos                                                                        | BamHI/ EcoRI        | GATCCGccggagcagaccagcaaaTTCAAGAGAttgctgctctcccgT TTTTACGGGTG     | AATTCACGGTAAAAAaccgggacagaccagcaaaTCTCTGAAAttgct ggtctctcccgCG       |
| <b>viral constructs</b>    |                          |                                                                                                          |                     |                                                                  |                                                                      |
| pLVX-shRNA2-Crimson-puro   |                          | ZsGreen cassette of pLVX-shRNA2 was replaced by Crimson and puromycin resistance                         |                     |                                                                  |                                                                      |
| shC                        | pLVX-shRNA2-Crimson-puro | direct cloning of annealed oligos                                                                        | BamHI/ EcoRI        | GATCCGttgtactacacaaaagtactgTCAAGAGacagcttttgtgtagataTTTTTACGGGTG | AATTCACGGTAAAAAAttgtactacacaaaagtactgTCTCTGAAcagta cttttgtgtagatacCG |
| sh1-1                      | pLVX-shRNA2-Crimson-puro | direct cloning of annealed oligos                                                                        | BamHI/ EcoRI        | GATCCGccggagcagaccagcaaaTTCAAGAGAttgctgctctcccgT TTTTACGGGTG     | AATTCACGGTAAAAAaccgggacagaccagcaaaTCTCTGAAAttgct ggtctctcccgCG       |
| shL1-1                     | pLVX-shRNA2-Crimson-puro | direct cloning of annealed oligos                                                                        |                     | GATCCGaaagaagaagagagcaaaTTCAAGAGAttgctctctcttTT TTTTACGGGTG      | AATTCACGGTAAAAAagaagaagaagagagcaaaTCTCTGAAAttgct ctctctctctCG        |
| shS2-1                     |                          | Addgene; (ID: 10905)                                                                                     |                     |                                                                  |                                                                      |
| GFP                        | pLVX puro- new MCS       | previously described (Stohr et al., Genes and Development 2011)                                          |                     |                                                                  |                                                                      |
| GFP-ZBP1                   | pLVX puro- new MCS       | previously described (Stohr et al., Genes and Development 2011)                                          |                     |                                                                  |                                                                      |
| GFP-LEF1                   | pLVX puro- new MCS       | RT-PCR, Zero Blunt (Life Technologies)                                                                   | BamHI EcoRI         | ccGGATCCatgcccaactctccggaggaggtggc                               | ccGAATTCcagatgtaggcagctgtcttctggac                                   |
| GFP-SNAI1                  | pLVX puro- new MCS       | PCR based on Addgene; pTK-SNAI1 (ID: 36976)                                                              | EcoRI XhoI          | agcGAATTCatgccgctctctctggtcagg                                   | gctCTCGAGtcagcagggcctccggagcagcc                                     |
| GFP-SNAI2                  | pLVX puro- new MCS       | PCR based on Addgene; pTK-SLUG (ID: 36986)                                                               | EcoRI XhoI          | gcaGAATTCatgccgctctctctggtcagg                                   | gcaCTCGAGtcagctgcccacagcagccagc                                      |

**Table T2: siRNAs**

| siRNA | sequence (5' to 3')  |
|-------|----------------------|
| siC   | UUGUACUACACAAAGUACUG |
| si1-1 | CCGGGAGCAGACCAGGCAA  |
| si1-2 | UGAAUGGCCACAGUUGGA   |
| si1-3 | CCAUCGCCAACACACAAA   |
| si2-1 | CCAUAAGAACAUCACUAA   |
| si3-1 | UAAGGAAGCUCAAGAUUA   |
| si1-1 | GAAAGAAUUGAGAGCGAAU  |
| si1-2 | GAUGGAAGCUUGUUGAAA   |

**Table T4: oligos**

| qRT-PCR             | forward (5' to 3')    | reverse (5' to 3')   |
|---------------------|-----------------------|----------------------|
| ACTB                | AGAAAATCTGCACCAACC    | AGAGCGTACAGGGATAGCA  |
| CDH1                | GCCGAGAGCTACACGTTTAC  | GTCGAGGAAAAATAGGCTG  |
| CTNNB1              | TCGAAATCTTGCCTTTGTC   | ATCCGAGCTAGGATGTGAA  |
| FN1                 | ACCAACCTACGGATGACTCG  | GCTCATCATCTGGCCATTTT |
| IGF2BP1             | TAGTACCAAGACACAGACCC  | GATTTCTGCCGTTGTGTGTC |
| IGF2BP2             | ATCGTCAGAATTACGGGCA   | GCGTTTGGTCTCATTCTGTC |
| IGF2BP3             | AGACACCTGATGAGAATGACC | GTTTCTGAGCCTTTACTTCC |
| LEF1                | CGGTACATAATGATSCCAA   | TCATCTAAGTGATGAGGGGG |
| MYC                 | AGCGACTCTGAGGAGGAAC   | CGTAGTTGTGCTGATGTGTG |
| PPIA                | GTCAACCCACCGTGTCTT    | CTGCTGCTTTGGGACCTGTG |
| RPLP0               | GCGGACCTGGAAGTCCAAC   | CCATCAGCACACAGCCTCT  |
| SNAI2               | TCGAAACCCACACATTACCTT | TTGGAGCAGTTTTGCACTG  |
| VCL                 | TTACAGTGGCAGAGGTGGTG  | TCACGGTGTTCATCGAGTTC |
| <b>ChIP qRT-PCR</b> |                       |                      |
|                     | forward (5' to 3')    | reverse (5' to 3')   |
| FN1 P1              | GCGGAATCCCGGTACTTAG   | GCCTCTGGCTCTGAGAAA   |
| FN1 P2              | GCGCTGAGAAGGAAGAAGT   | CCATCCCGTCCCTTTCTTT  |
| SNAI2               | TGCCCCCTCTCTGCAAGATT  | TTCCGCGAAGCAGGGGAGCG |
| CDH1                | TGTTGGTGTGCACCTGTACT  | GGGCTTTTACACTTGGCTGA |
| Intergenic          | CGTCTGTGCTATTACCCGCC  | TGCCTCATAGTACTGCGCT  |

**Table T3: antibodies**

| primary antibody                               | produced in | company/provider                                  |
|------------------------------------------------|-------------|---------------------------------------------------|
| anti-ACTB                                      | mouse       | Sigma Aldrich                                     |
| anti-CDH1                                      | rabbit      | Sigma Aldrich                                     |
| anti-CDH1                                      | rabbit      | Abcam                                             |
| anti-CDH2                                      | mouse       | Santa Cruz                                        |
| anti-CTNNB1                                    | rabbit      | Cell Signaling                                    |
| anti-CTNNB1                                    | mouse       | Santa Cruz                                        |
| anti-CTNND1                                    | mouse       | BD Transductions                                  |
| anti-Fibronectin                               | mouse       | Santa Cruz                                        |
| anti-Flag                                      | mouse       | Sigma Aldrich                                     |
| anti-GFP                                       | mouse       | Roche                                             |
| anti-HSP27 (HSPB1)                             | goat        | Santa Cruz                                        |
| anti-IGF2BP1                                   | mouse       | BSBS AB facility                                  |
| anti-IGF2BP2                                   | mouse       | BSBS AB facility                                  |
| anti-IGF2BP3                                   | mouse       | BSBS AB facility                                  |
| anti-IgG                                       | mouse       | Millipore                                         |
| anti-KRT8                                      | rat         | kind gift of AG Prof.Magin, University of Leipzig |
| anti-LEF1 (C18A7)                              | rabbit      | Cell Signaling                                    |
| anti-SNAI1                                     | mouse       | Cell Signaling                                    |
| anti-SNAI2                                     | rabbit      | Cell Signaling                                    |
| anti-TUBA4A, DM1α                              | mouse       | Sigma Aldrich                                     |
| anti-VCL                                       | mouse       | Sigma Aldrich                                     |
| anti-VIM                                       | mouse       | BD Transductions                                  |
| anti-ZEB1                                      | rabbit      | Santa Cruz                                        |
| ChiPAB+ anti-LEF1                              | mouse       | Millipore                                         |
| <b>secondary antibodies</b>                    |             |                                                   |
| IRDye® 700 anti-IgG-mouse-infrared-dye         | donkey      | LI-COR Biosciences GmbH                           |
| IRDye® 700 anti-IgG-rabbit-infrared-dye        | donkey      | LI-COR Biosciences GmbH                           |
| IRDye® 800CW anti-IgG-mouse-infrared-dye       | donkey      | LI-COR Biosciences GmbH                           |
| IRDye® 800CW anti-IgG-rabbit-infrared-dye      | donkey      | LI-COR Biosciences GmbH                           |
| IRDye® 800CW anti-IgG-rat-infrared-dye         | donkey      | LI-COR Biosciences GmbH                           |
| IRDye® 800CW anti-IgG-goat-infrared-dye        | donkey      | LI-COR Biosciences GmbH                           |
| dylight488TM-conjugated anti-mouse-IgG F(ab)2  | donkey      | Jackson ImmunoResearch                            |
| dylight488TM-conjugated anti-rabbit-IgG F(ab)2 | donkey      | Jackson ImmunoResearch                            |
| CyTM3-conjugated anti-mouse-IgG F(ab)2         | donkey      | Jackson ImmunoResearch                            |
| CyTM3-conjugated anti-rabbit-IgG F(ab)2        | donkey      | Jackson ImmunoResearch                            |
| dylight649TM-conjugated anti-mouse-IgG F(ab)2  | donkey      | Jackson ImmunoResearch                            |
| dylight649TM-conjugated anti-rabbit-IgG F(ab)2 | donkey      | Jackson ImmunoResearch                            |
